# Supplementary material for: Targeting Oncogenic Mutant p53 and BCL-2 for Small Cell Lung Cancer Treatment
Source: MDPI journal article supplement (doi:10.3390/ijms241713082), 2023-08-23
Supplement: s1 [file s1]

Figure S1

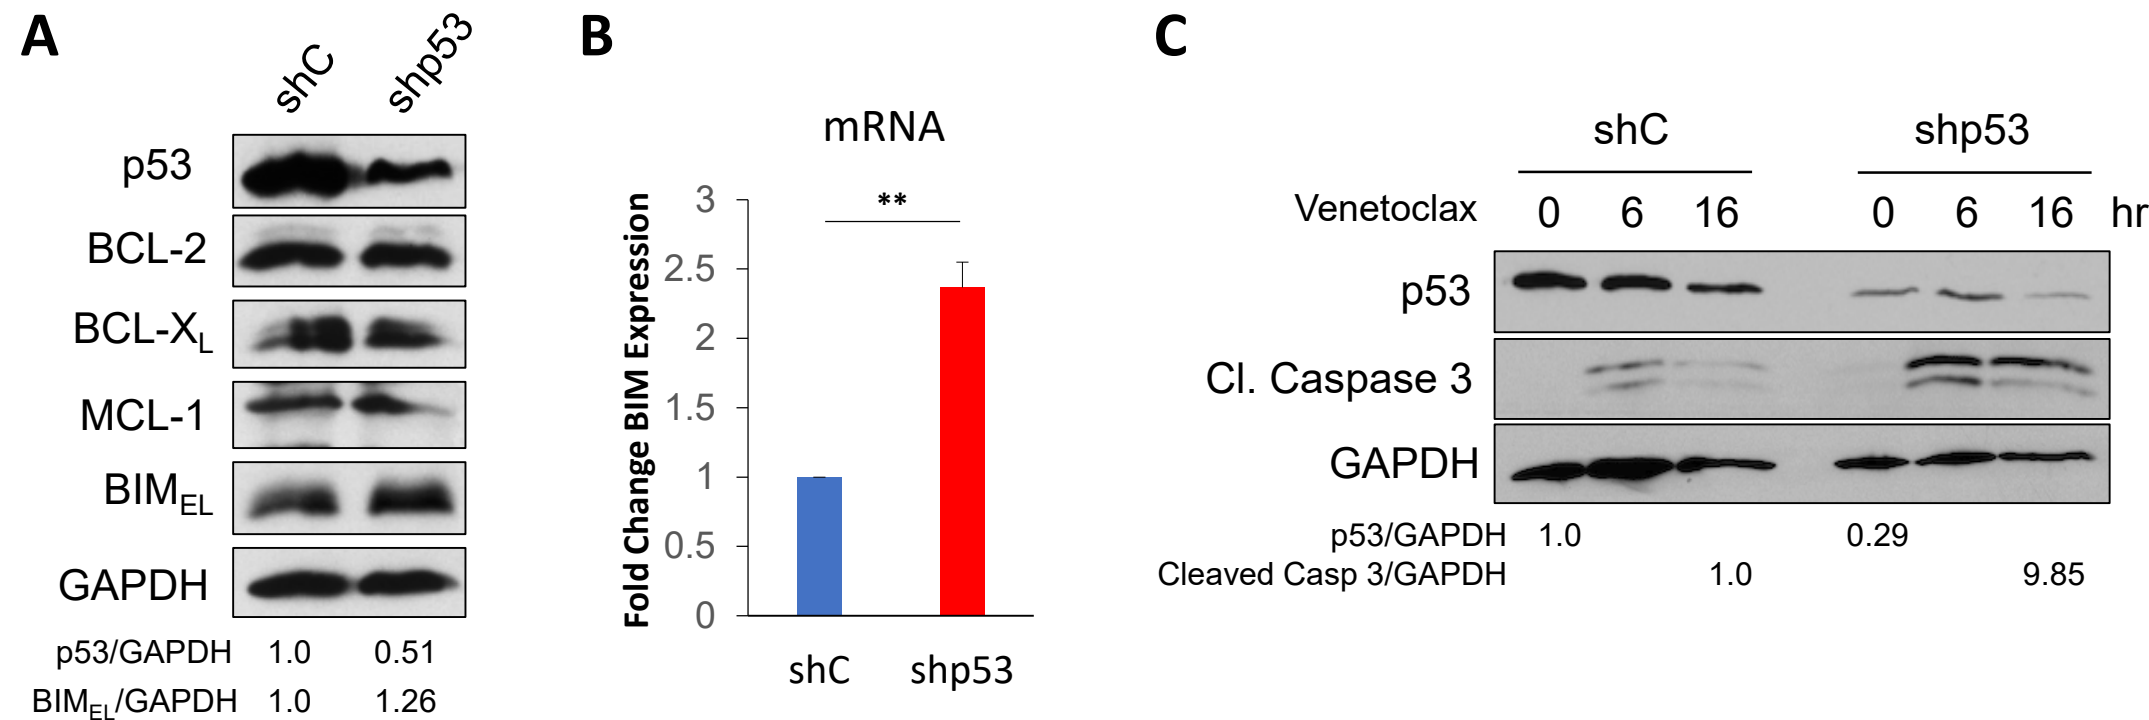

**Figure S1.** Down-regulation of Onc-p53 induces BIM and sensitizes SCLC to venetoclax in H211 cells. (A) Onc-p53 was downregulated by shRNA (shp53) in H211 cells. The levels of BCL-2 family proteins compared to scrambled shRNA control (shC) were determined by Western blots with the indicated antibodies. (B) The levels of *Bim* mRNA in H211 shp53 and scrambled RNA control cells were determined by qRT-PCR. (C) H211 shp53 and scrambled RNA control cells were treated with 1  $\mu$ M venetoclax. Total cell extracts were prepared at the indicated time points and were subjected to Western blots with the indicated antibodies. \*\*p<0.01. Error bars equal SD.

Figure S2

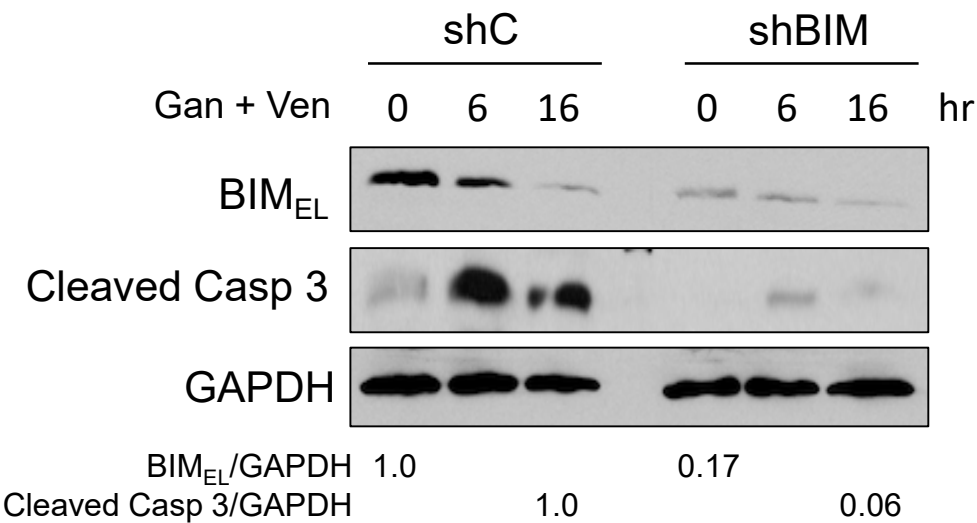

**Figure S2.** Down-regulation of BIM mitigates cell death induced by venetoclax and ganetespib in H211 cells. H211 shBIM and scrambled RNA control cells were treated with 1  $\mu$ M venetoclax and/or 50 nM ganetespib. Total cell extracts were prepared at the indicated time points and were subjected to Western blots with the indicated antibodies.

Figure S3

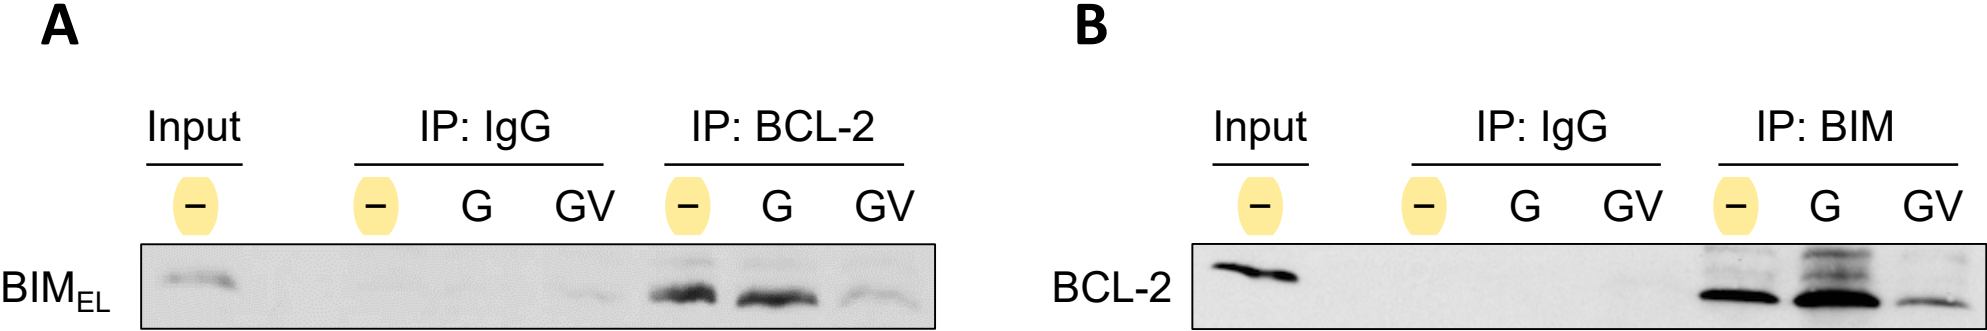

**Figure S3.** Co-immunoprecipitation with normal IgG indicates that anti-BCL-2 and anti-BIM antibodies are specific. H1048 cells were treated with 1  $\mu$ M venetoclax and/or 50 nM ganetespib for 8 hours. Total cell lysates were subjected to immunoprecipitation with (A) normal mouse IgG and anti-BCL-2 antibodies, (B) normal rabbit IgG and anti-BIM antibodies. Western blot analyses were carried out on precipitated samples with the indicated antibodies. Input demonstrated the integrity of each cell lysate.

# Original Western Blots

In 300 dpi

Fig 1A

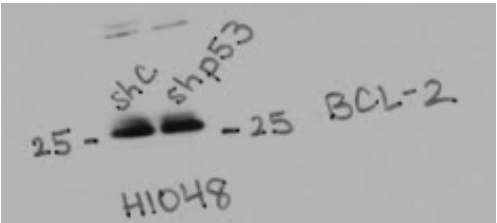

BCL-2 (25 kD)

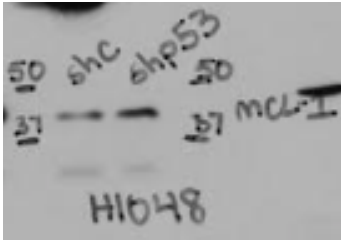

MCL-1 (40 kD)

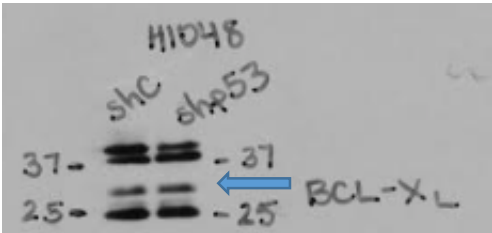

BCL-XL (30 kD)

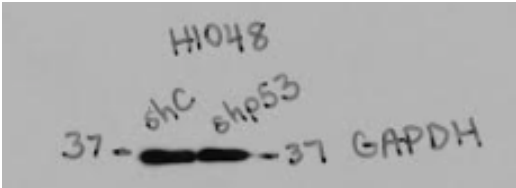

GAPDH (37 kD)

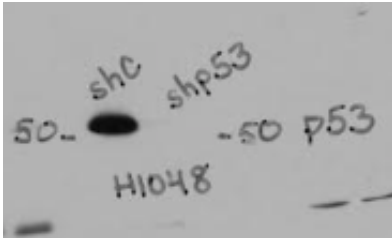

p53 (53 kD)

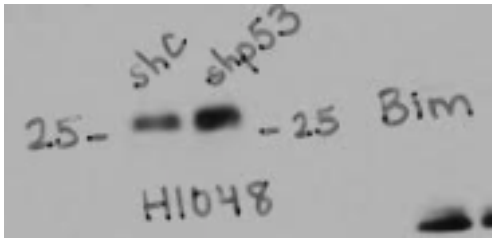

BIM<sub>EL</sub> (25 kD)

Fig 1C

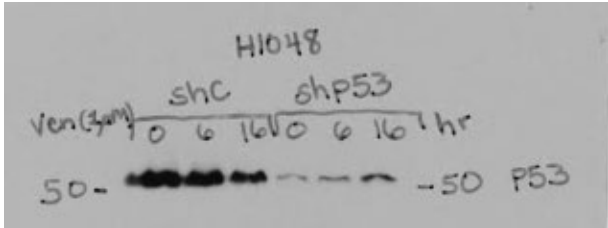

p53 (53 kD)

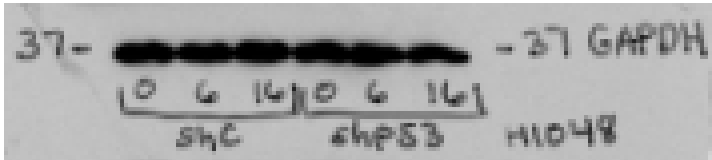

GAPDH (37 kD)

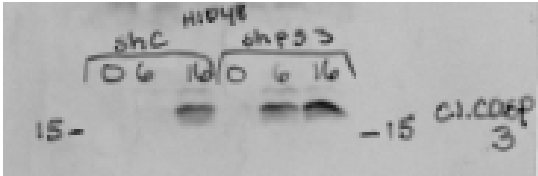

Cleaved Caspase 3 (19 kD)

Fig 2A

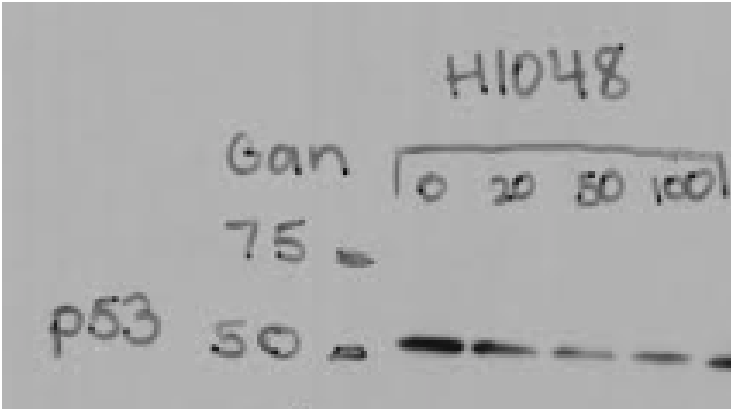

p53 (53 kD)

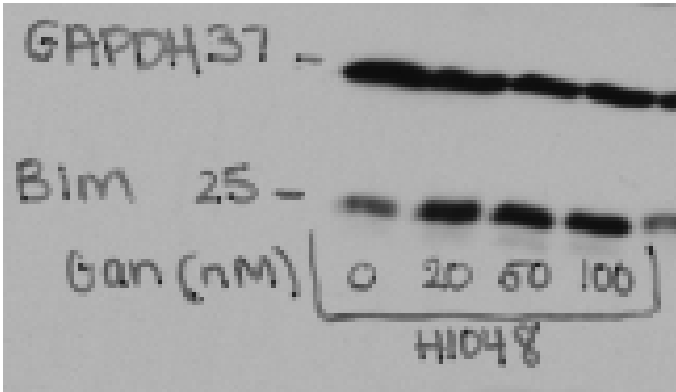

GAPDH (37 kD) and BIM<sub>EL</sub> (25 kD)

Fig 2D

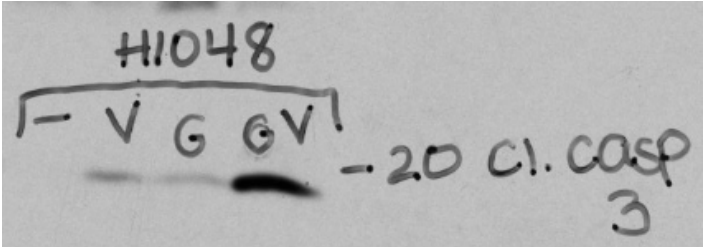

Cleaved Caspase 3 (19 kD)

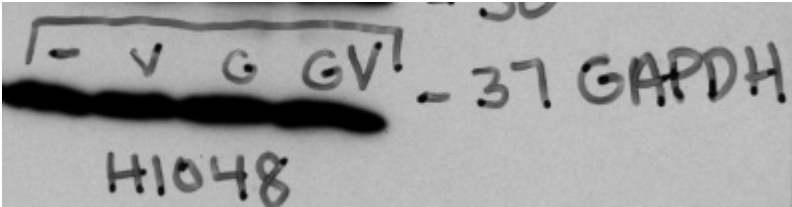

GAPDH (37 kD)



Fig 4B

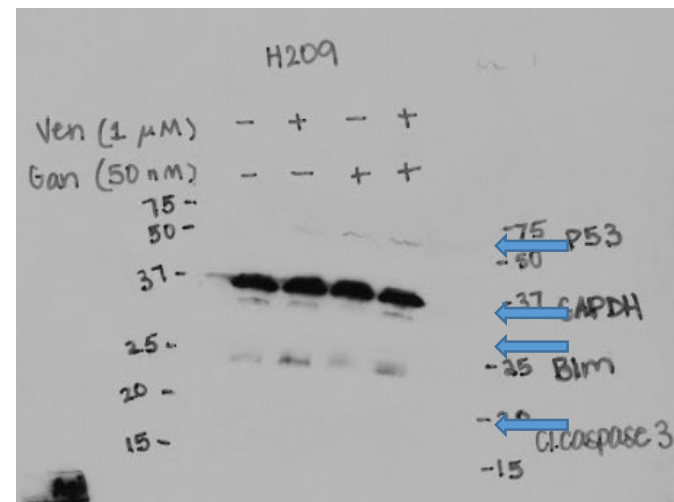

p53 (53 kD), GAPDH (37 kD), BIM<sub>EL</sub> (25 kD),  
Cleaved Caspase 3 (19 kD)

Fig 5B

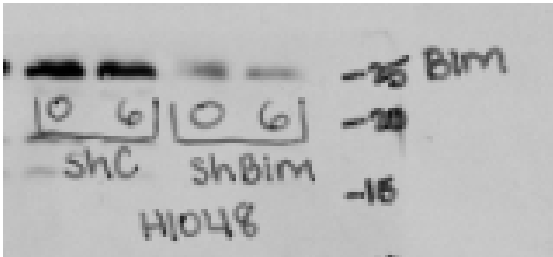

BIM<sub>EL</sub> (25 kD)

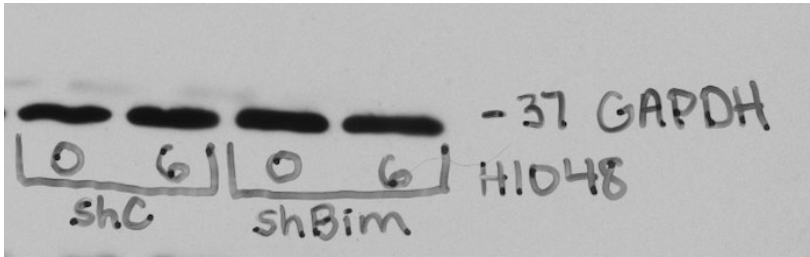

GAPDH (37 kD)

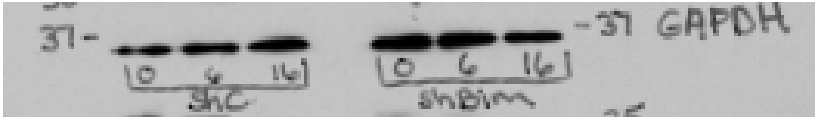

GAPDH (37 kD)

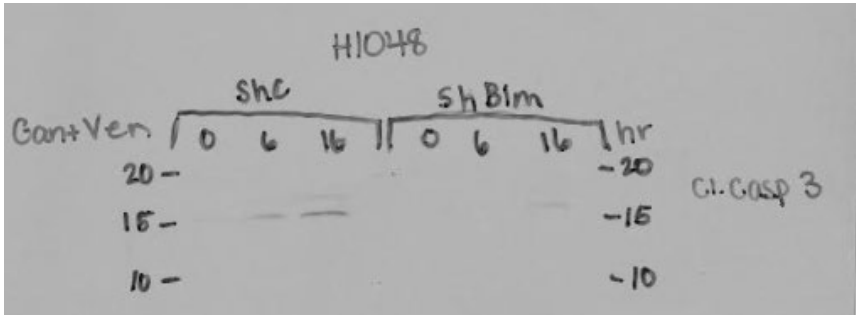

Cleaved Caspase 3 (19 kD)

Fig 6A

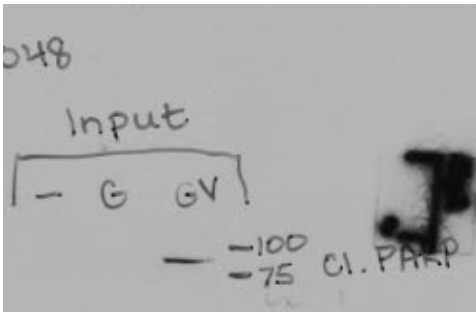

Cleaved PARP (89 kD)

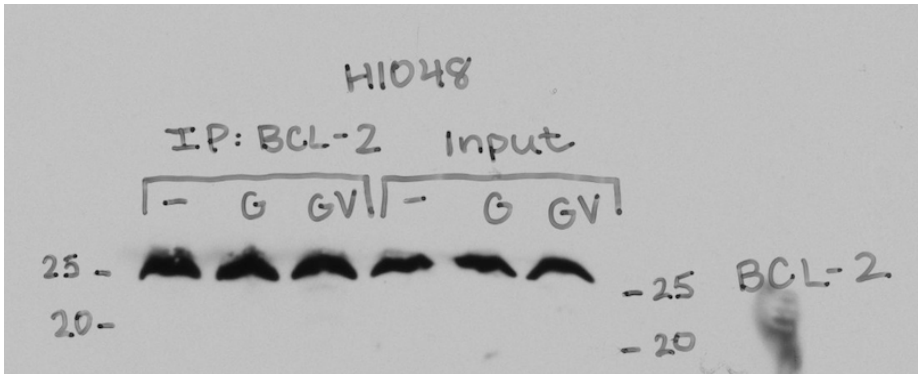

BCL-2 (25 kD)

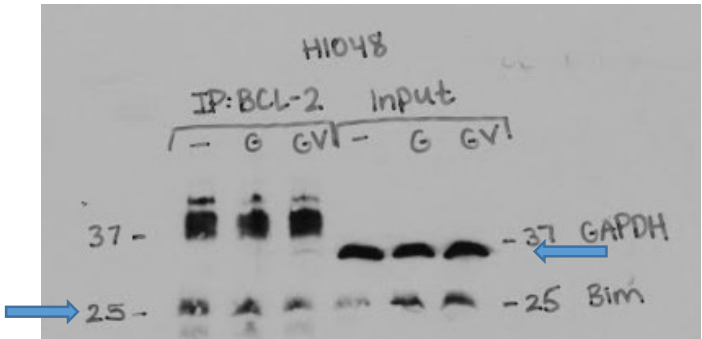

GAPDH (37 kD) and BIM<sub>EL</sub> (25 kD)

Fig 6B

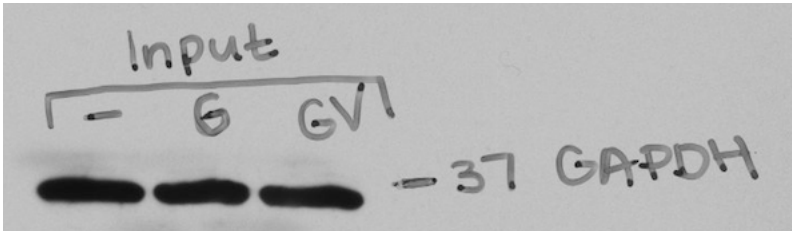

GAPDH (37 kD)

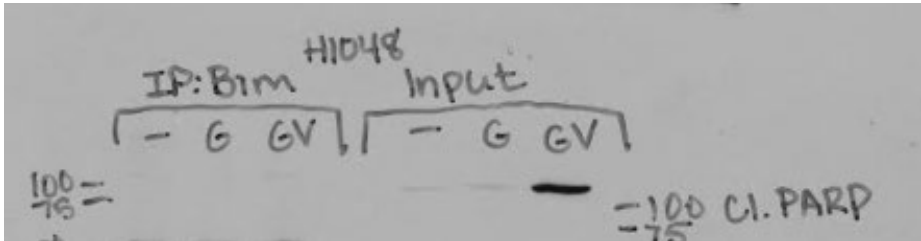

Cleaved PARP (89 kD)

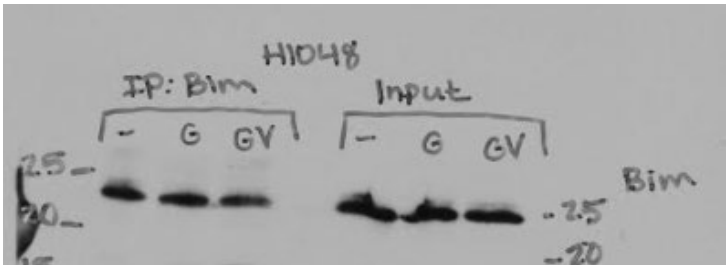

BIM<sub>EL</sub> (25 kD)

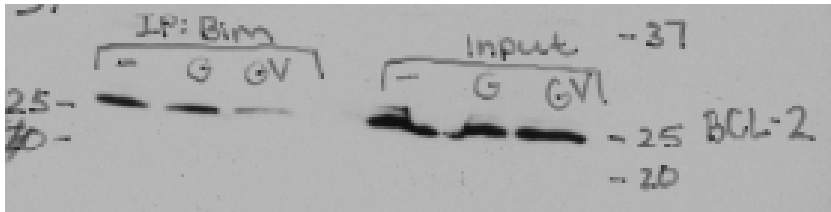

BCL-2 (25 kD)

Fig 6C

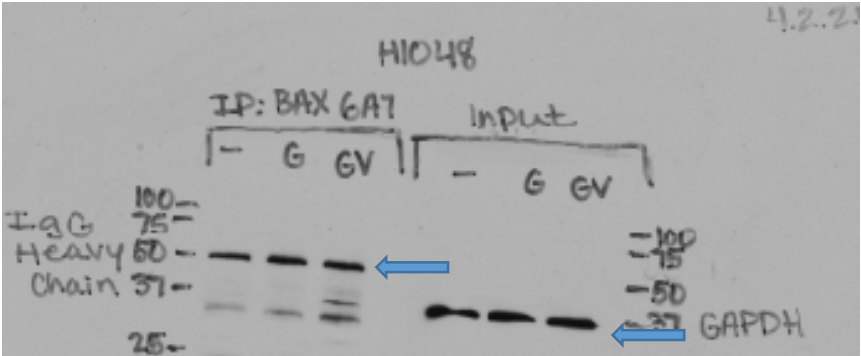

IgG heavy chain (~50 kD) and GAPDH (37 kD)

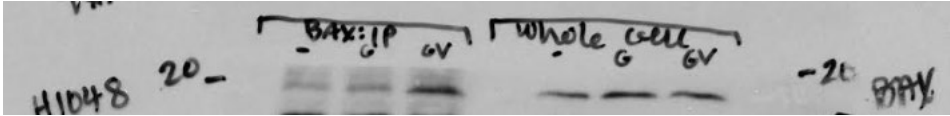

BAX (20 kD)

Fig S1A

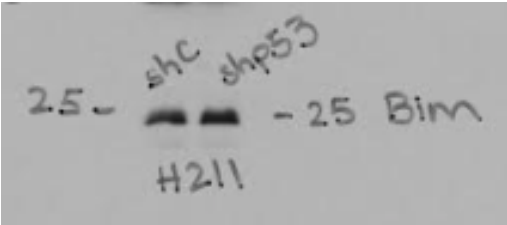

BIM<sub>EL</sub> (25 kD)

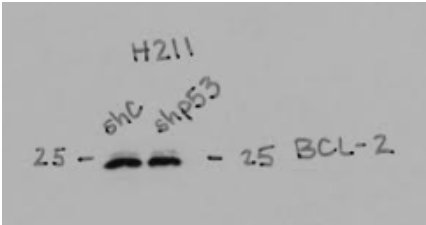

BCL-2 (25 kD)

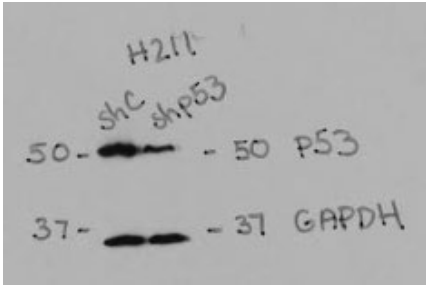

p53 (53 kD) and GAPDH (37 kD)

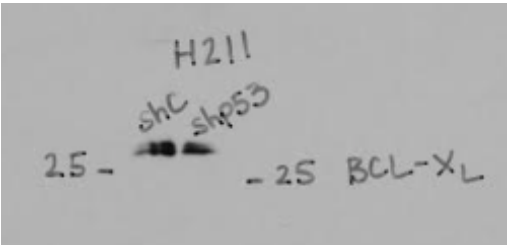

BCL-XL (30 kD)

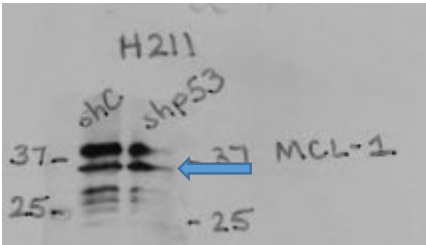

MCL-1 (40 kD)

Fig S1C

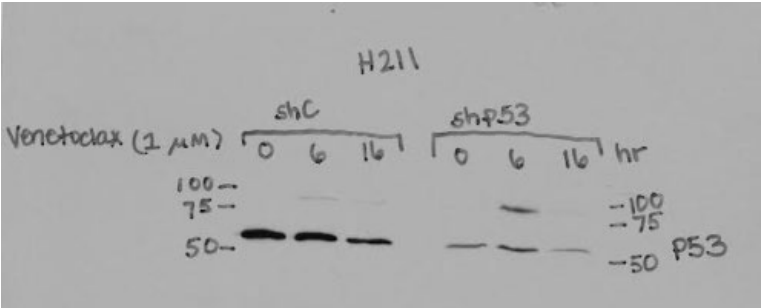

p53 (53 kD)

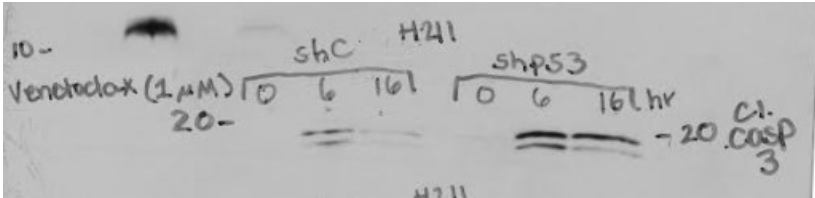

Cleaved Caspase 3 (19 kD)

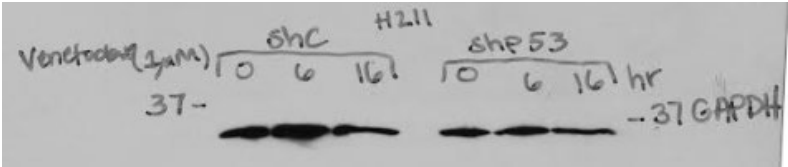

GAPDH (37 kD)

Fig S2

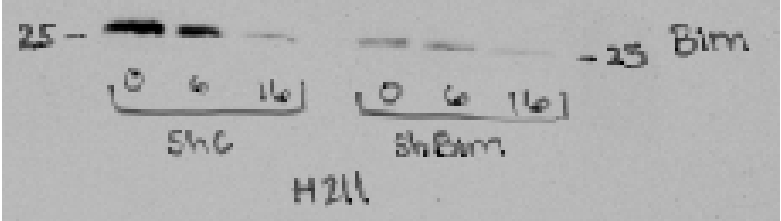

BIM<sub>EL</sub> (25 kD)

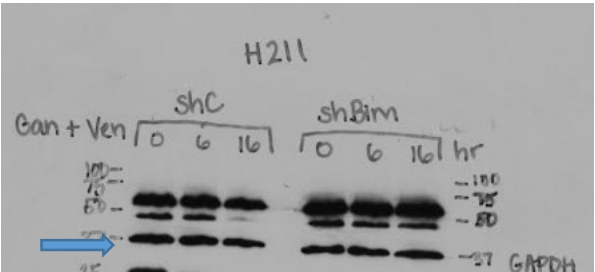

GAPDH (37 kD)

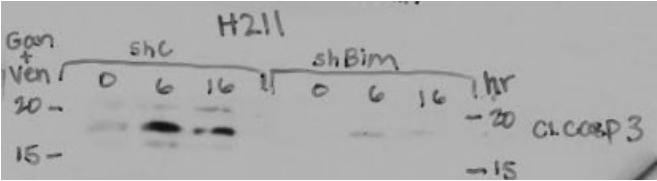

Cleaved Caspase 3 (19 kD)



Fig S3

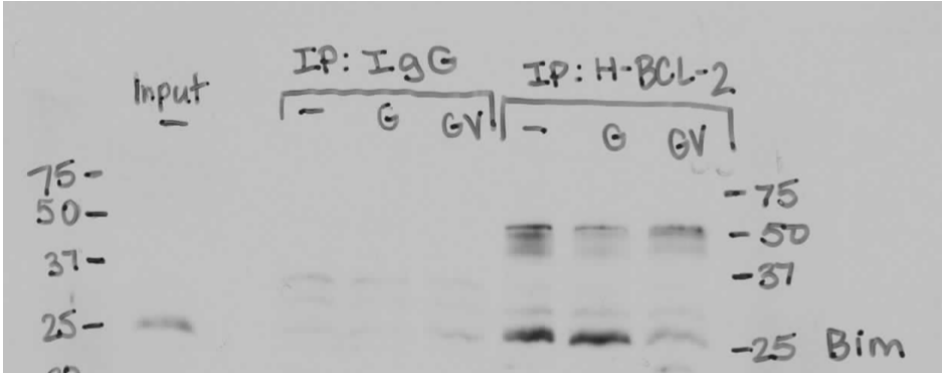

BIM<sub>EL</sub> (25 kD)

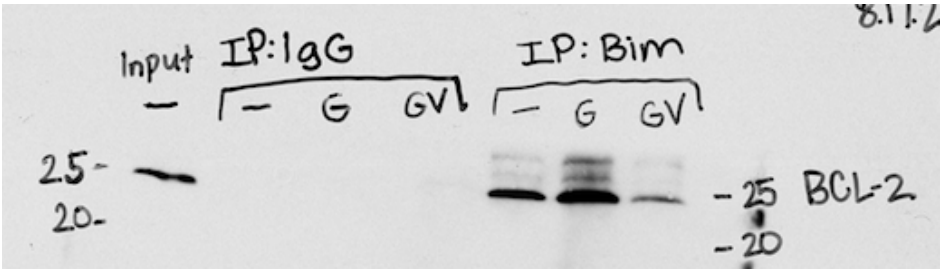

BCL-2 (25 kD)
